# Supplementary material for: Mangiferin blocks proliferation and induces apoptosis of breast cancer cells via suppression of the mevalonate pathway and by proteasome inhibition
Source: Royal Society of Chemistry journal article supplement (doi:10.1039/c6fo01037g), 2016-01-01
Supplement: c6fo01037g1.pdf [file c6fo01037g1.pdf]

# SUPPLEMENTAL INFORMATIONS

## MCF-7

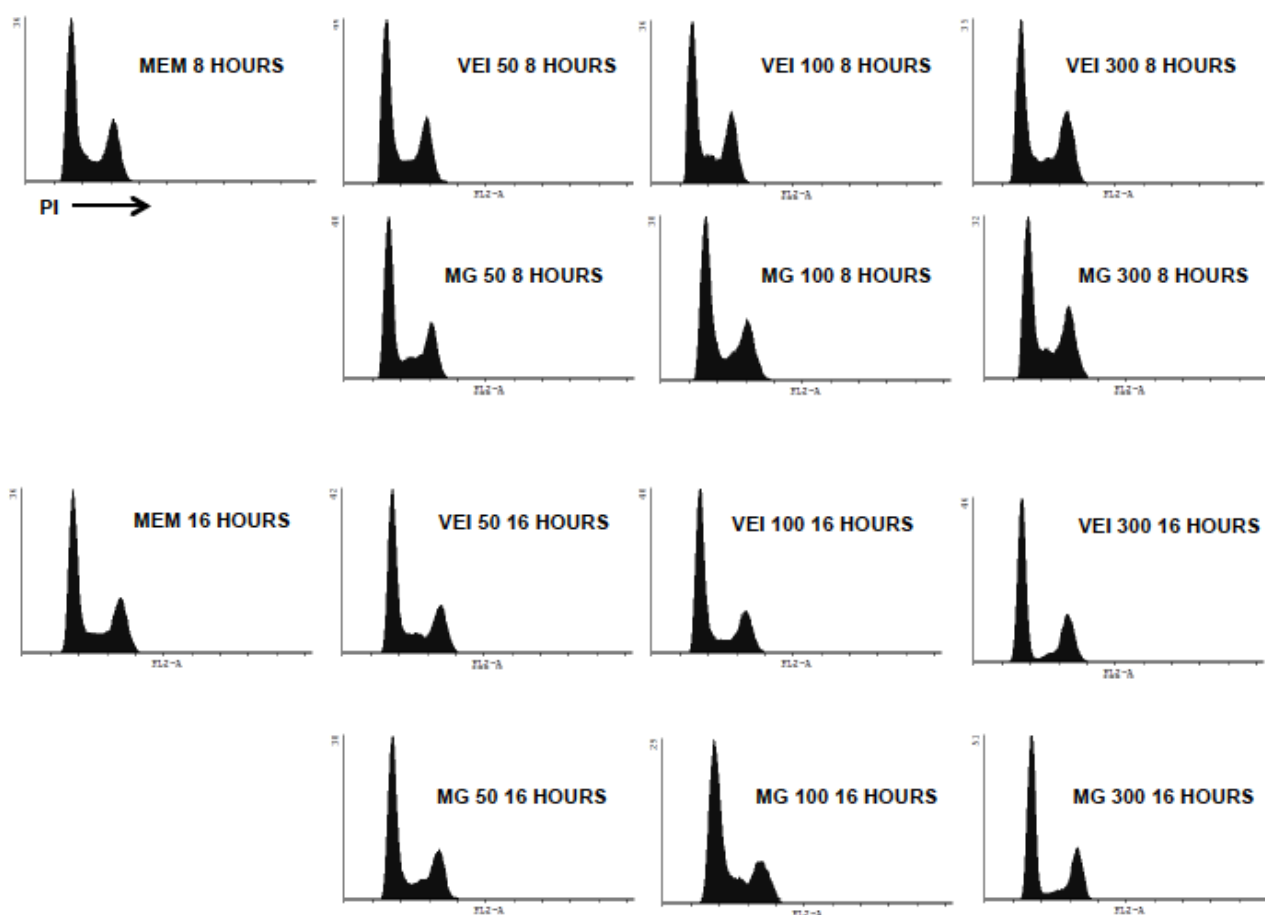

**Figure A:** Cell cycle analysis of MCF-7 cells by propidium iodide (PI) staining and flow cytometry after treatment with DMSO and 50-300  $\mu$ M mangiferin at 8 and 16 h.

## MCF10A

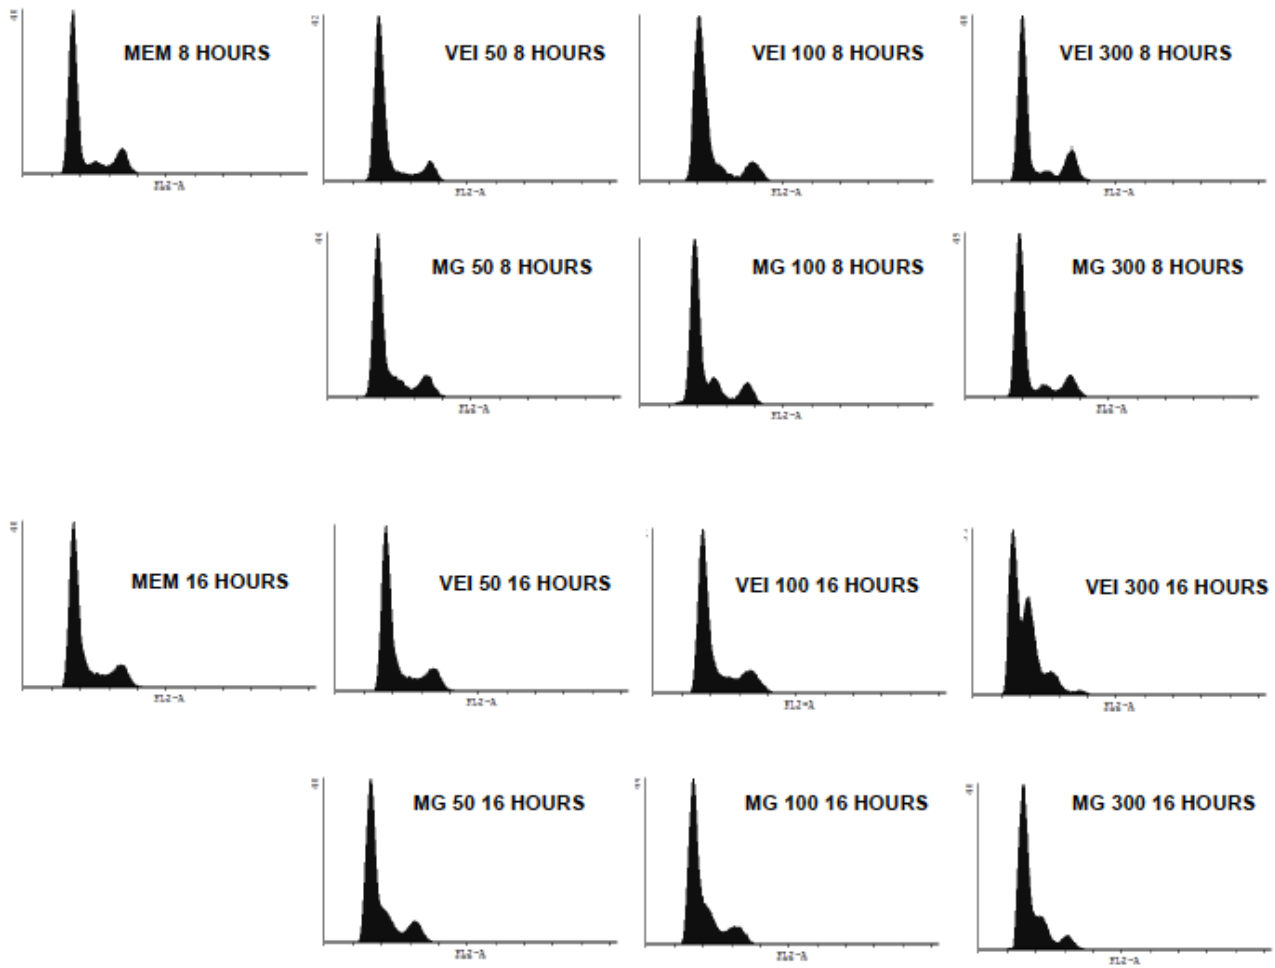

**Figure B:** Cell cycle analysis of MCF10A cells by propidium iodide (PI) staining and flow cytometry after treatment with DMSO and 50-300  $\mu$ M mangiferin at 8 and 16 h.

**Table 1:** MCF-7 and MCF10A cell cycle analysis

| <b>MCF-7</b>       | <b>% OF CELLS</b> |          |             | <b>MCF10A</b>      | <b>% OF CELLS</b> |              |              |
|--------------------|-------------------|----------|-------------|--------------------|-------------------|--------------|--------------|
| <b>TREATMENT</b>   | <b>G0/G1</b>      | <b>S</b> | <b>G2/M</b> | <b>TREATMENT</b>   | <b>G0/G1</b>      | <b>S</b>     | <b>G2/M</b>  |
| <b>MEM 8H</b>      | 51,14             | 21,36    | 27,49       | <b>MEM 8H</b>      | 71,87             | 12,66        | 15,45        |
| <b>VEI 50 8H</b>   | 51,19             | 18,97    | 29,83       | <b>VEI 50 8H</b>   | 75,85             | 12,37        | <b>11,76</b> |
| <b>VEI 100 8H</b>  | 44,6              | 25,19    | 30,19       | <b>VEI 100 8H</b>  | 71,84             | 13,96        | 14,18        |
| <b>VEI 300 8H</b>  | 42,35             | 25,25    | 32,06       | <b>VEI 300 8H</b>  | 68,75             | <b>11,71</b> | 19,52        |
| <b>MG 50 8H</b>    | 50,35             | 21,97    | 27,67       | <b>MG 50 8H</b>    | 68,25             | 17,37        | 14,36        |
| <b>MG 100 8H</b>   | 51,21             | 20,1     | 28,67       | <b>MG 100 8H</b>   | 66,9              | 19,84        | 13,25        |
| <b>MG 300 8H</b>   | 49,57             | 22,4     | 28,01       | <b>MG 300 8H</b>   | 62,21             | 25,14        | 12,64        |
| <b>MEM 16H</b>     | 54,55             | 22,64    | 22,8        | <b>MEM 16H</b>     | 71,03             | 13,71        | 15,24        |
| <b>VEI 50 16H</b>  | 56,19             | 19,36    | 24,44       | <b>VEI 50 16H</b>  | 68,64             | 16,75        | 14,59        |
| <b>VEI 100 16H</b> | 59,14             | 18,09    | 22,75       | <b>VEI 100 16H</b> | 69,4              | 18,01        | 17,07        |
| <b>VEI 300 16H</b> | 63,51             | 12,61    | 23,85       | <b>VEI 300 16H</b> | 45,42             | 35,64        | 18,92        |
| <b>MG 50 16H</b>   | 56,37             | 20,89    | 22,75       | <b>MG 50 16H</b>   | 62,69             | 21,39        | 15,91        |
| <b>MG 100 16H</b>  | 60,57             | 19,45    | 19,96       | <b>MG 100 16H</b>  | 66,01             | 21,21        | 12,68        |
| <b>MG 300 16H</b>  | 61,87             | 11,65    | 26,47       | <b>MG 300 16H</b>  | 64,71             | 24,31        | 10,96        |
